# Supplementary material for: Organometallic chemistry of bromodifluoromethyl substituted phosphines. The development of a novel nickel catalysed P–C bond forming reaction
Source: Royal Society of Chemistry journal article supplement (doi:10.1039/b311799e), 2003-01-01
Supplement: b311799e.doc [file b311799e.doc]

**Supplementary information:**

**Selected Spectroscopic data and procedures:**

Ph2PCF2Br **(1)**

Neat CF2Br2 (0.892mL, 2.05g, 9.76 mmols) was added to a cold solution of Ph2PSiMe3 (0.5 mL, 0.51g, 1.95 mmols) in diethyl ether. After swirling this reaction flask and leaving for one hour, all volatiles were removed to give the pure product. Selected data:

[ P = 28.5, t, 2JP-F = 68 Hz; F = -42, d, 2JP-F = 68 Hz].

General procedure for catalytic reactions

To a Schlenk flask containing Ph2PCF2Br (0.232g, 0.736 mmols, 1 equiv.) was added [Ni(dippf)Cl2], (12 mg, 2.209 x 10-5 mols, 3 %) followed by dry acetonitrile (8 mL). Ph2PSiMe3 (0.220g, 0.847 mmols, 1.25 equiv.) was then added via a syringe, the tube was wrapped in tin foil and heated to the desired temperature. The progress of the reaction was monitored by 31P NMR. Under optimised conditions (Ph2P)2CF2 of sufficient purity for further reactions could be obtained by filtration through a plug of alumina. Selected data (Ph2P)2CF2 **(2)** [P = 5.5, t, 2JP-F = 73Hz; F = -95, t, 2JF-P = 73 Hz].

General procedure for metal complexes:

The solid metal precursors were added to solutions of (Ph2P)CF2Br in dry dichloromethane, and monitored by 31P NMR. The complexes were isolated and stored in air by removal of solvent and precipitation and/or washing with hexane.

The *cis* geometry of [*cis*-Pt(Ph2PCF2Br)2Cl2], **(3)** was readily assigned by examination of 1JP-Pt coupling constants [P = 44.7, tt + satellites, 1JP-Pt = 3850 Hz, 2JP-F = 51 Hz, 5JP-F = 7.3 Hz].

The magnitude of 1JP-Rh in complex **(4**) is fairly typical of a rhodium (III) phosphine complex of this type [ P = 54, dt, 1JP-F = 154 Hz, 2JP-F = 64 Hz]. Both 1JP-Pt and 1JP-Rh are larger than that found in the corresponding Ph2PCH3 complexes [1JP-Pt  = 3621Hz; 1JP-Rh = 146 Hz].

**Crystal structure determination of *trans*-[Pd(Cy3P)2Br2].**


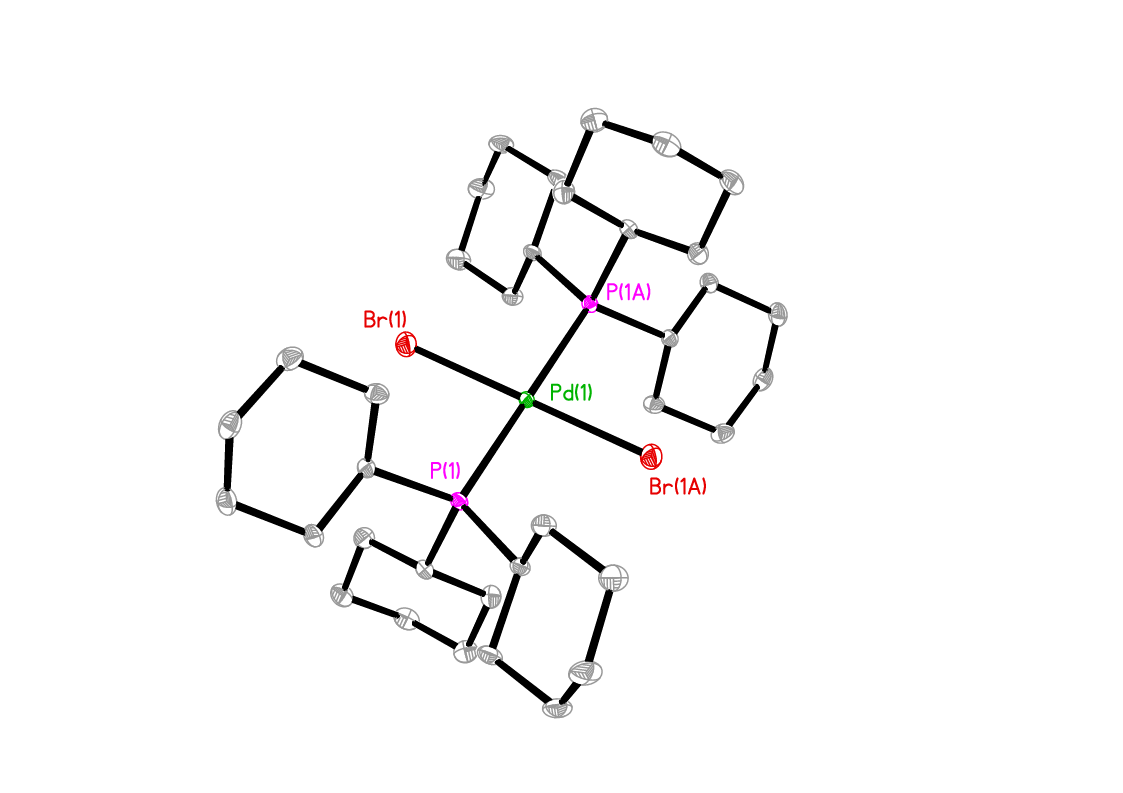


# Thermal Ellipsoid (30%) Structure for *trans-*[Pd(Cy3P)2Br2]

(Hydrogens excluded for clarity).

**Table 2.** Crystal data and structure refinement for ***trans***-[Pd(Cy3P)2Br2].

Empirical formula C18 H33 Br P Pd 0.50

Formula weight 413.52

Temperature 173(2) K

Wavelength 0.71073 Å

Crystal system Triclinic

Space group P-1

Unit cell dimensions a = 9.9954(15) Å  = 112.589(2)°

b = 10.1866(15) Å  = 109.652(2)°

c = 10.7114(16) Å  = 92.205(2)°

Volume 930.5(2) Å3

Z 2

Reflections collected 9717

Independent reflections 4201 [Rint = 0.0232]

Completeness to  = 27.53° 98.3 %

Absorption correction sadabs

Refinement method Full-matrix least-squares on F2

Data / restraints / parameters 4201 / 0 / 187

Goodness-of-fit on F2 S = 1.100

R indices [for 3440 reflections with I>2(I)] R1 = 0.0392, wR2 = 0.1172

R indices (for all 4201 data) R1 = 0.0483, wR2 = 0.1211

Weighting scheme w-1 = 2(Fo2) + (aP)2 + (bP),

where P = [max(Fo2, 0) + 2Fc2]/3

a = 0.5810, b = 2.1044

Largest diff. peak and hole 1.428 and -1.457 eÅ-3

**Table 3**. Bond lengths [Å] and angles [°] for ***trans***-[Pd(Cy3P)2Br2].

_____________________________________________________

Pd(1)-P(1)#1 2.3631(10)

Pd(1)-P(1) 2.3631(10)

Pd(1)-Br(1)#1 2.4363(5)

Pd(1)-Br(1) 2.4363(5)

P(1)-C(13) 1.845(4)

P(1)-C(7) 1.852(4)

P(1)-C(1) 1.854(4)

P(1)#1-Pd(1)-P(1) 180.00(5)

P(1)#1-Pd(1)-Br(1)#1 89.15(3)

P(1)-Pd(1)-Br(1)#1 90.85(3)

P(1)#1-Pd(1)-Br(1) 90.85(3)

P(1)-Pd(1)-Br(1) 89.15(3)

Br(1)#1-Pd(1)-Br(1) 180.0

C(13)-P(1)-C(7) 104.22(18)

C(13)-P(1)-C(1) 109.53(19)

C(7)-P(1)-C(1) 102.91(18)

C(13)-P(1)-Pd(1) 113.10(13)

C(7)-P(1)-Pd(1) 110.69(13)

C(1)-P(1)-Pd(1) 115.34(13)

_____________________________________________________________

Symmetry transformations used to generate equivalent atoms: #1 -x+1,-y+1,-z
